# Supplementary material for: Constructing a novel strategy for carbon-doped TiO2 multiple-phase nanocomposites toward superior electrochemical performance for lithium ion batteries and the hydrogen evolution reaction
Source: Royal Society of Chemistry journal article supplement (doi:10.1039/c7ta01184a), 2017-01-01
Supplement: c7ta01184a1.pdf [file c7ta01184a1.pdf]

## Electronic supplementary materials

### Constructing a novel strategy by carbon doped TiO<sub>2</sub> multiple-phase nanocomposites toward the superior electrochemical performance for lithium ion batteries and hydrogen evolution reaction

Yueming Li, <sup>\*\*[a,c]</sup>, Jinran Shen,<sup>[a]</sup> Junjie Li,<sup>[a]</sup> Shimin Liu,<sup>[a]</sup> Dongli Yu,<sup>[a]</sup> Rongchen Xu,<sup>[b]</sup> Wen-Fu Fu,<sup>[b]</sup> and Xiao-Jun Lv. <sup>\*[b]</sup>

a. State Key Laboratory of Metastable Materials Science and Technology, College of Materials Science and Engineering, Yanshan University, Qinhuangdao, Hebei Province, 066004, China.

b. Key Laboratory of Photochemical Conversion and Optoelectronic Materials and HKU-CAS Joint Laboratory on New Materials, Technical Institute of Physics and Chemistry, Chinese Academy of Sciences, Beijing 100190, P.R. China, E-mail: xjlv@mail.ipc.ac.cn

c. Key Laboratory of Advanced Energy Materials Chemistry (Ministry of Education), Nankai University, Tianjin 300071, China

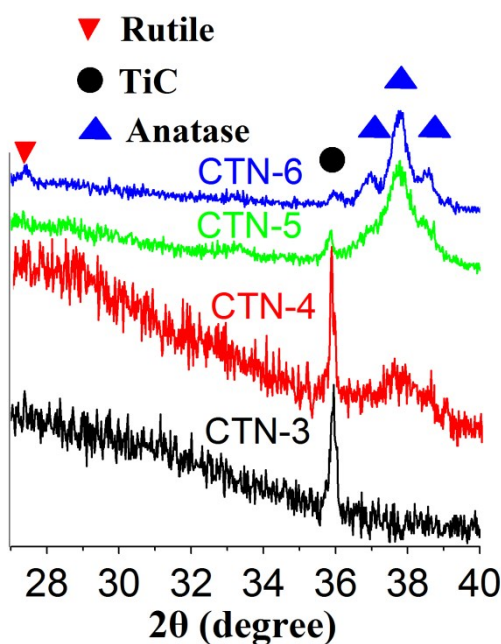

Figure S1 XRD patterns of CTN-3, CTN-4, CTN-5 and CTN-6 between 27 and 40°

\* E-mail: liyueming@ysu.edu.cn

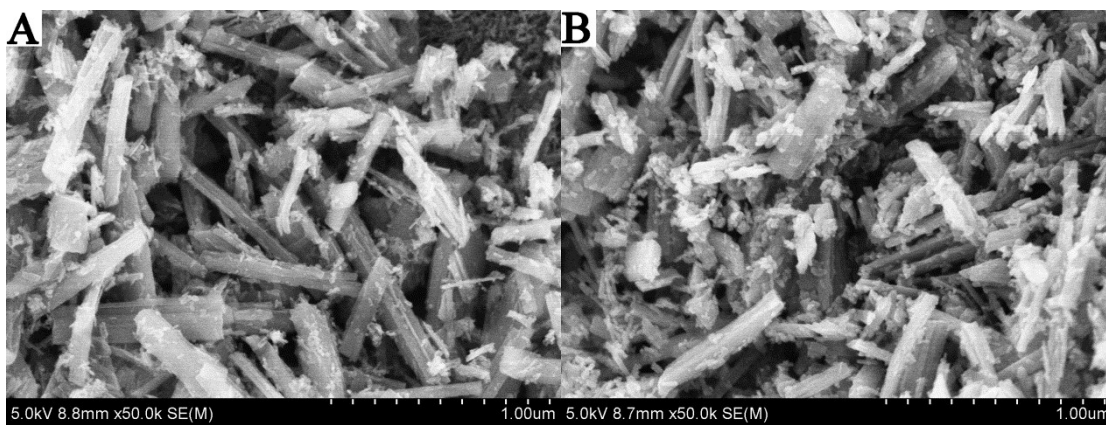

**Figure S2** SEM image of CTN-5 (A) and CTN-6 (B)

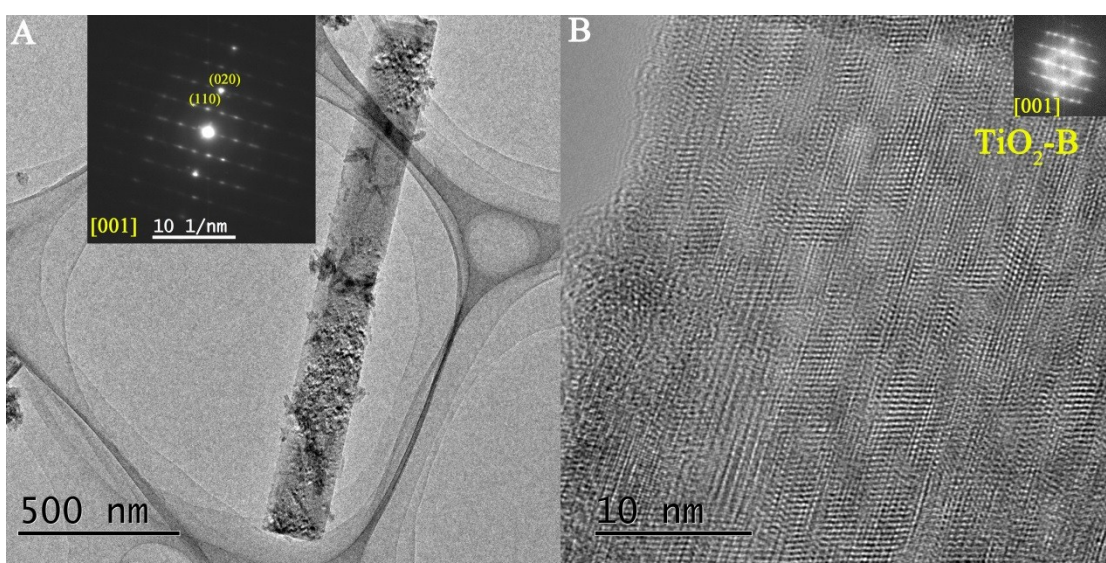

**Figure S3.** (A) TEM image of CTN-3 (Inset: SAED image of CTN-3) (B) Typical HRTEM image of CTN-3 (Inset: FFT image)

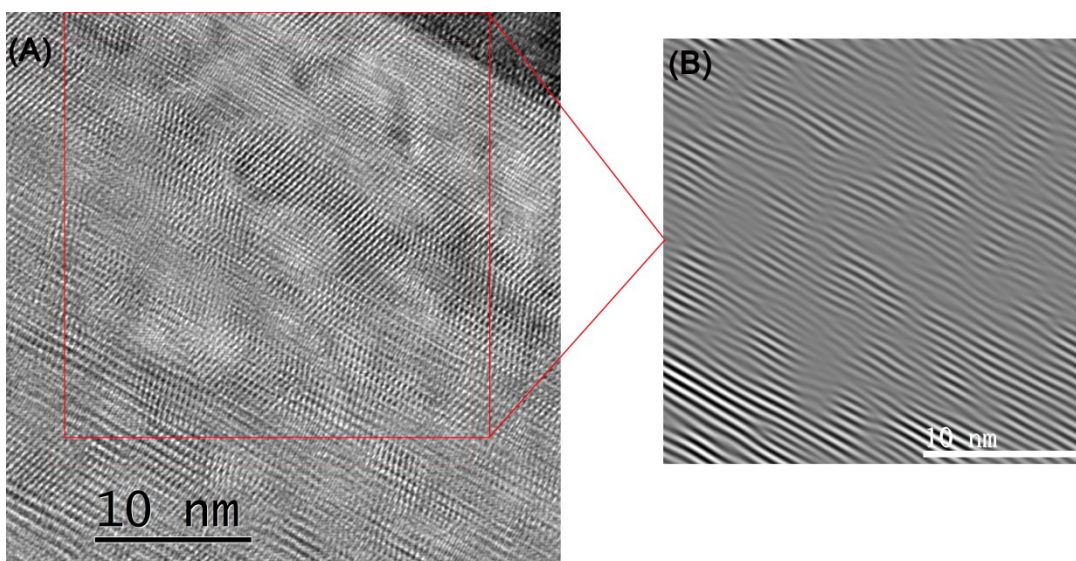

**Figure S4.** HRTEM image of CTN-4 (A) and Filtered inverse FFT image (B)

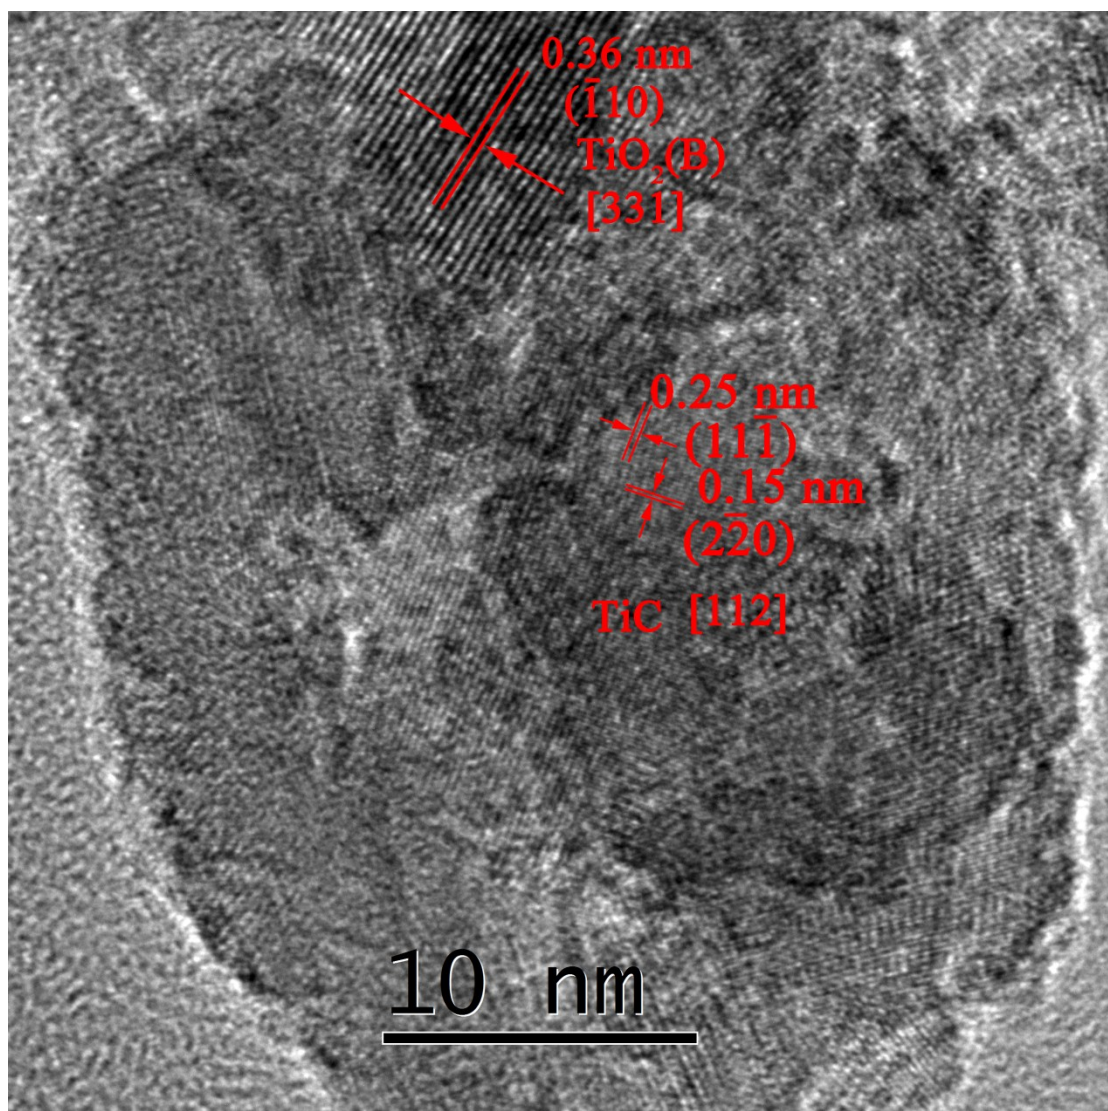

**Figure S5.** HRTEM of TiC particles

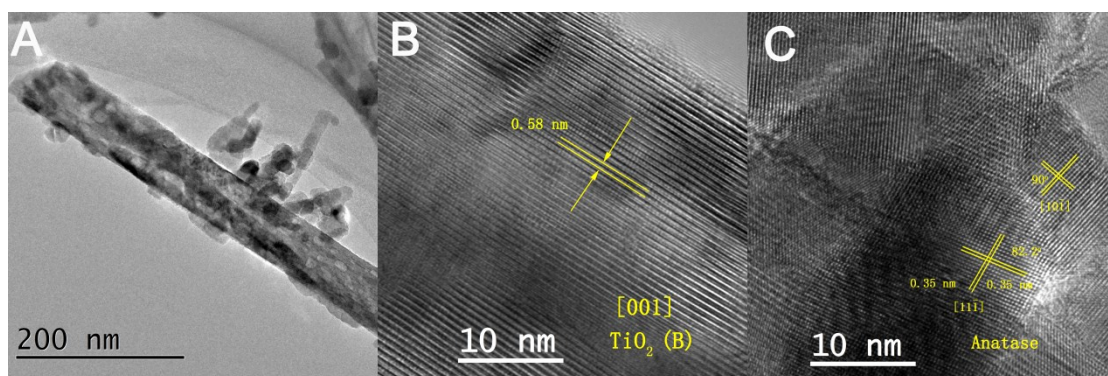

**Figure S6.** TEM image of CTN-6 (A), HRTEM of CTN-6 nanobelt (B) and HRTEM of nanoparticles on the surface of CTN-6 (C)

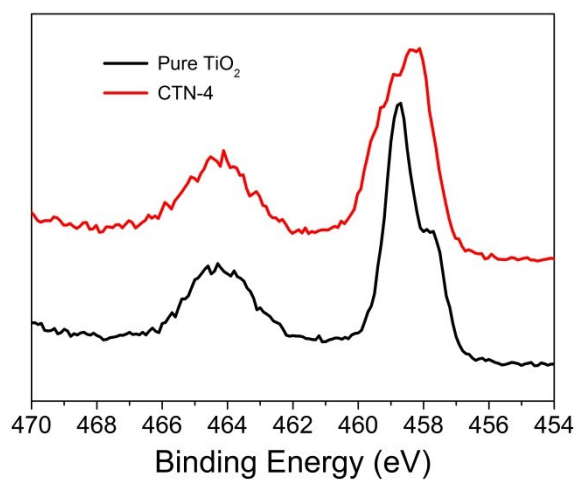

**Figure S7.** High resolution XPS spectra of pure  $\text{TiO}_2$  and CTN-4

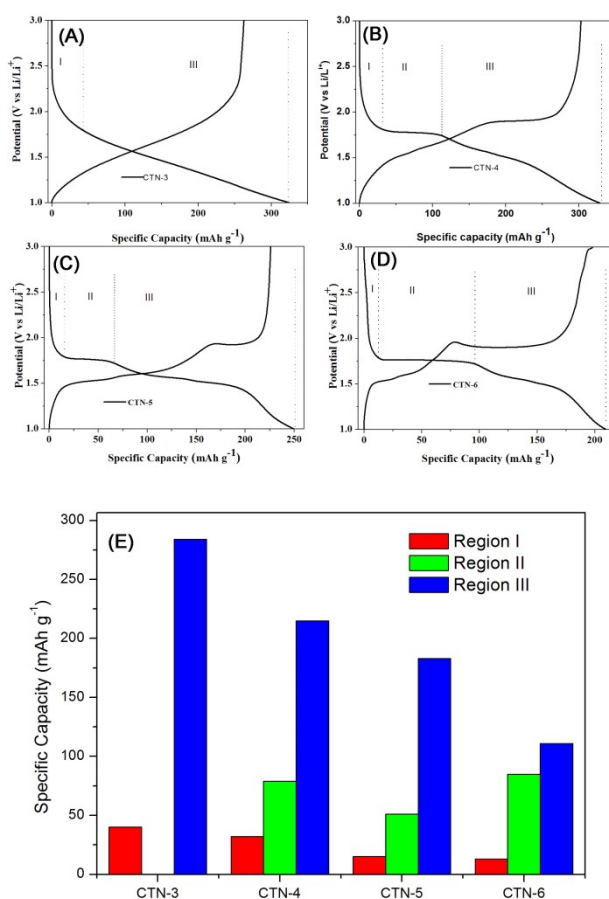

**Figure S8.** The second Charge-discharge curves of CTN-3 (A), CTN-4 (B), CTN-5(C) and CTN-6; Capacity contribution from different regions in the discharge curves of CTN-3, CTN-4, CTN-5 and CTN-6 (E).

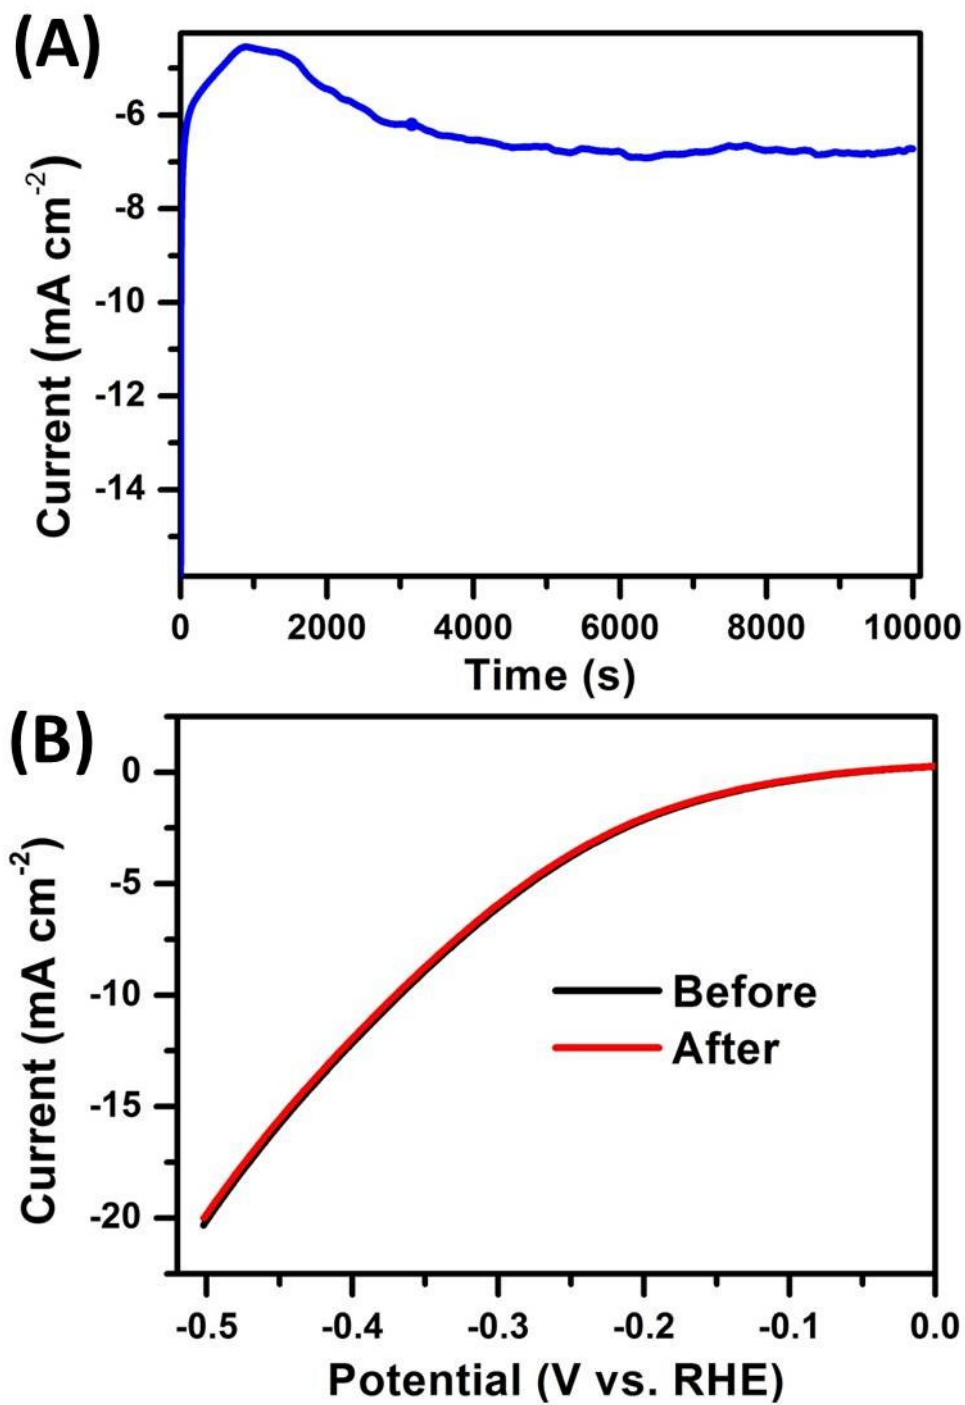

**Figure S9.** Polarization curves (before and after 3 h stability) of the CTN-4 nanobelt composites

**Table S1** The phase components for as prepared sample

| Containing phase           | CTN-3 | CTN-4 | CTN-5 | CTN-6       |
|----------------------------|-------|-------|-------|-------------|
| TiC phase                  | Yes   | Yes   | Yes   | None        |
| TiO <sub>2</sub> (B) phase | Yes   | Yes   | Yes   | Yes         |
| Anatase phase              | None  | Yes   | Yes   | Yes         |
| Rutile phase               | None  | None  | None  | Yes (minor) |

**Table S2** Electrochemical Performance of TiO<sub>2</sub> based materials as anode in LIB

| Electrode materials                                     | Voltage Window (V) | Specific capacity (mAh g <sup>-1</sup> )                                              | References |
|---------------------------------------------------------|--------------------|---------------------------------------------------------------------------------------|------------|
| TiO <sub>2</sub> (B) nanosheets/EOG foam                | 1-3                | ~110 @ 10 A g <sup>-1</sup> *                                                         | [1]        |
| Peapod-like TiO <sub>2</sub> /carbon                    | 1-3                | 132 @ 1.675 A g <sup>-1</sup>                                                         | [2]        |
| TiO <sub>2</sub> (B) nanosheets/carbon nanotube         | 1-3                | 147 @ 6 A g <sup>-1</sup>                                                             | [3]        |
| TiO <sub>2</sub> (B)/anatase TiO <sub>2</sub> /graphene | 1-3                | 140 @ 3 A g <sup>-1</sup>                                                             | [4]        |
| mesoporous TiO <sub>2</sub> /graphitic carbon           | 1-3                | 145 @ 10.2 A g <sup>-1</sup>                                                          | [5]        |
| TiO <sub>2</sub> -Carbon Hybrid Nanostructures          | 1-3                | 123 @ 7.2 A g <sup>-1</sup>                                                           | [5]        |
| Carbon-doped TiO <sub>2</sub> (B) nanowire              | 1-3                | 172 @ 3.3 A g <sup>-1</sup>                                                           | [6]        |
| Anatase TiO <sub>2</sub> Nanosheets/TiO <sub>2</sub> -B | 1-3                | 110 @ 8.5 A g <sup>-1</sup>                                                           | [7]        |
| CTN-4                                                   | 1-3                | 188 @ 5 A g <sup>-1</sup><br>159 @ 10 A g <sup>-1</sup><br>142 @ 15 A g <sup>-1</sup> | This work  |

\* mass loading 1.7 mg cm<sup>-2</sup>

## References

- [1] G. Ren, M. N. F. Hoque, J. Liu, J. Warzywoda, Z. Fan, *Nano Energy* **2016**, *21*, 162.
- [2] L. Peng, H. Zhang, Y. Bai, Y. Feng, Y. Wang, *Chem. – A European J.* **2015**, *21*, 14871.
- [3] C. Chen, X. Hu, Z. Wang, X. Xiong, P. Hu, Y. Liu, Y. Huang, *Carbon* **2014**, *69*, 302.
- [4] W. Song, J. Chen, X. Ji, X. Zhang, F. Xie, D. J. Riley, *J. Mater. Chem. A* **2016**, *4*, 8762.
- [5] Y. Liu, A. A. Elzatahry, W. Luo, K. Lan, P. Zhang, J. Fan, Y. Wei, C. Wang, Y. Deng, G. Zheng, F. Zhang, Y. Tang, L. Mai, D. Zhao, *Nano Energy* **2016**, *25*, 80.
- [6] S. Goriparti, E. Miele, M. Prato, A. Scarpellini, S. Marras, S. Monaco, A. Toma, G. C. Messina, A. Alabastri, F. D. Angelis, L. Manna, C. Capiglia, R. P. Zaccaria, *ACS Appl. Mater. Interf.* **2015**, *7*, 25139.

[7] Q. Wu, J. Xu, X. Yang, F. Lu, S. He, J. Yang, H. J. Fan, M. Wu, *Adv. Energy Mater.* **2015**, *5*, 1401756.
